# Supplementary material for: Quantifying mechanical abrasion of AgNP nanocomposites: influence of AgNP content on abrasion products and rate of microplastic production
Source: Royal Society of Chemistry journal article supplement (doi:10.1039/d3en00888f), 2024-01-01
Supplement: d3en00888f1.pdf [file d3en00888f1.pdf]

Supporting information of:

Quantifying Mechanical Abrasion of AgNP Nanocomposites: Influence of AgNP content on  
abrasion products and rate of microplastic production

Joana Marie Sipe<sup>a</sup>, William Berger<sup>a</sup>, Nathan Bossa<sup>a</sup>, Melissa Chernick<sup>b</sup>, Keana C.K. Scott<sup>c</sup>, Alan Kennedy<sup>d</sup>, Mark Ballentine<sup>d</sup>, Treye Thomas<sup>e</sup>, Christine Ogilvie Hendren<sup>a,f</sup>, Mark R. Wiesner<sup>a\*</sup>

<sup>a</sup>Department of Civil and Environmental Engineering, Duke University, Durham, NC, 27708, USA

<sup>b</sup>Department of Toxicology, Duke University, Durham, NC, 27708, USA

<sup>c</sup>Materials Measurement Science Division, National Institute of Standards and Technology, 100 Bureau Drive, MS-8372 Gaithersburg, MD 20899, United States

<sup>d</sup>US Army Engineer Research and Development Center, Environmental Laboratory, 3909 Halls Ferry Rd. Vicksburg, MS, USA

<sup>e</sup>United States Consumer Product Safety Commission, 4330 East-West Highway, Bethesda, Maryland 20814, United States

<sup>f</sup>Department of Geological and Environmental Sciences, Appalachian State University, 287 Rivers St, Boone, NC 28608, USA

\* Corresponding authors

*Mark R. Wiesner*, Email Address: [wiesner@duke.edu](mailto:wiesner@duke.edu), Office Location: 120 Hudson Hall,  
Durham, NC 27708-0287, Office Phone: (919) 660-5292

Number of pages: 16

Number of tables: 6

Number of figures: 17

**Artificial sea water composition:**

Cl<sup>-</sup>=19.3, Na<sup>+</sup>=10.7, SO<sub>4</sub><sup>2-</sup>=2.6, Mg=1.3, K<sup>+</sup>=0.4, Ca<sup>2+</sup>=0.4 and CO<sub>3</sub><sup>2-</sup>=0.2 g/L

**Moderately hard freshwater composition:**

96 mg/L NaHCO<sub>3</sub> , 60 mg/L CaSO<sub>4</sub>·2H<sub>2</sub>O , 60 mg/L MgSO<sub>4</sub> , 4 mg/L KCl

Table S1: Standard deviations for abrasion rates

| Sample  | Low Power Slope of Regression | Standard Error of Slope | High Power Slope of Regression | Standard Error of Slope | p-value   |
|---------|-------------------------------|-------------------------|--------------------------------|-------------------------|-----------|
| PETG    | 0.0355                        | 0.014                   | 0.1179                         | 0.1514                  | 1.279e-06 |
| 0.5% Ag | 0.0433                        | 0.0296                  | 0.1014                         | 0.0615                  | 2.2e-16   |
| 2% Ag   | 0.0341                        | 0.0248                  | 0.0965                         | 0.1468                  | 4.47e-16  |

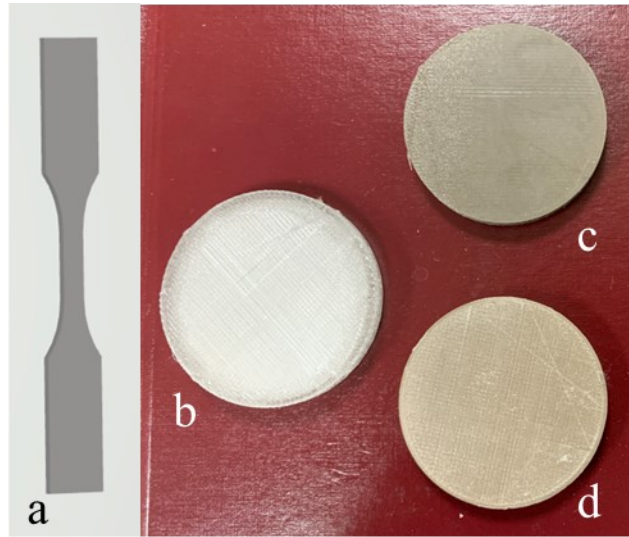

Figure S1: a) shape of an ASTM dogbone and the PETG (b), 2%Ag (c), and (d) 0.5%Ag pucks.

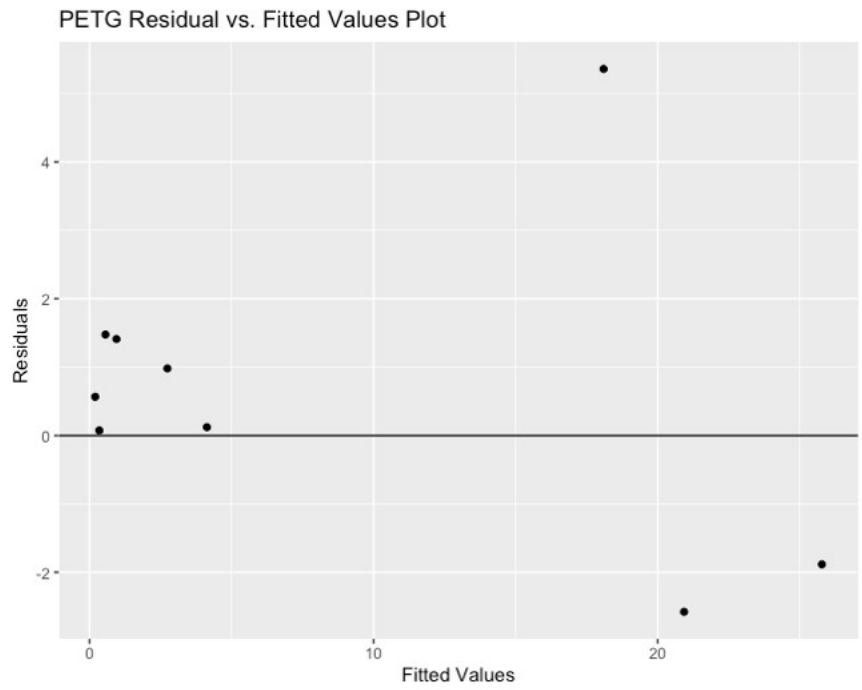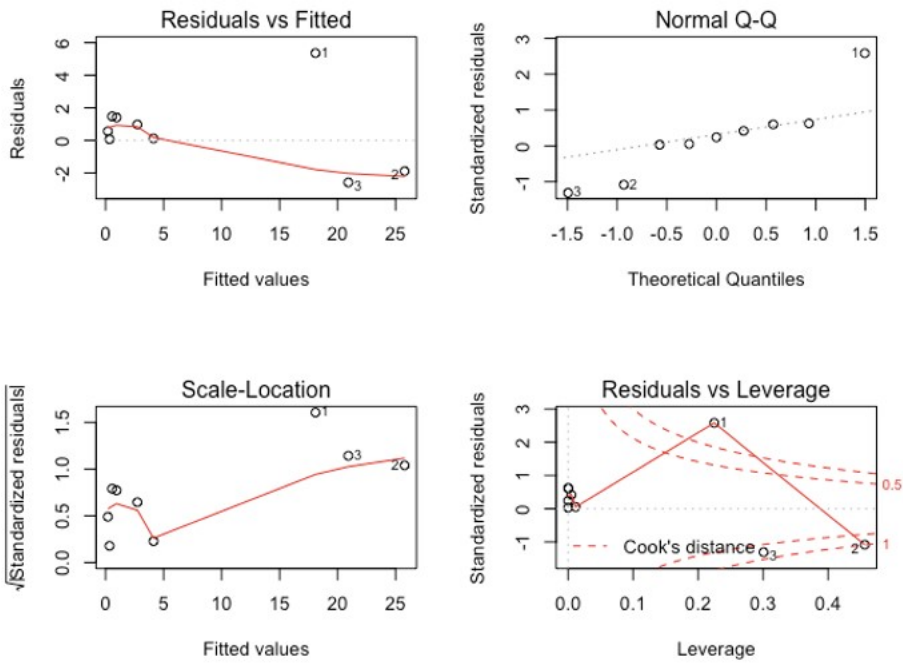

Figure S2: PETG Statistical Tests with Residual Plot

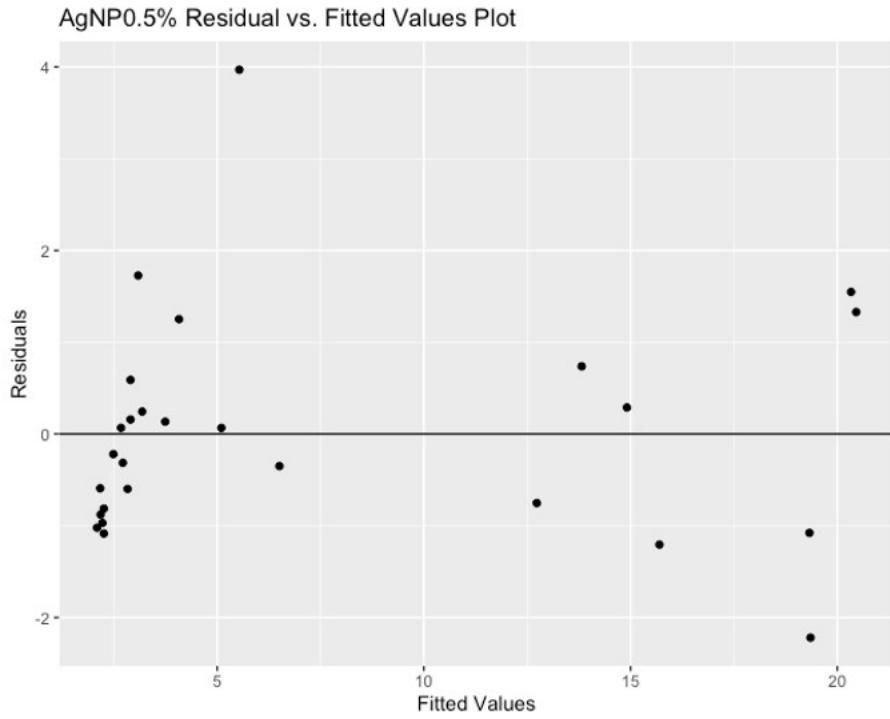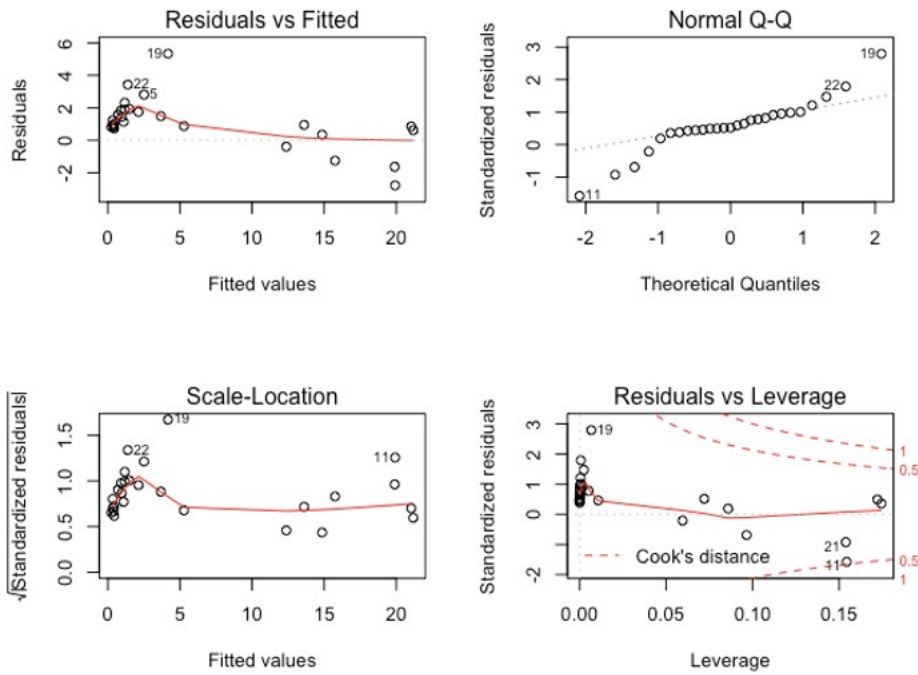

Figure S3: AgNP 0.5% Statistical Tests with Residual Plot

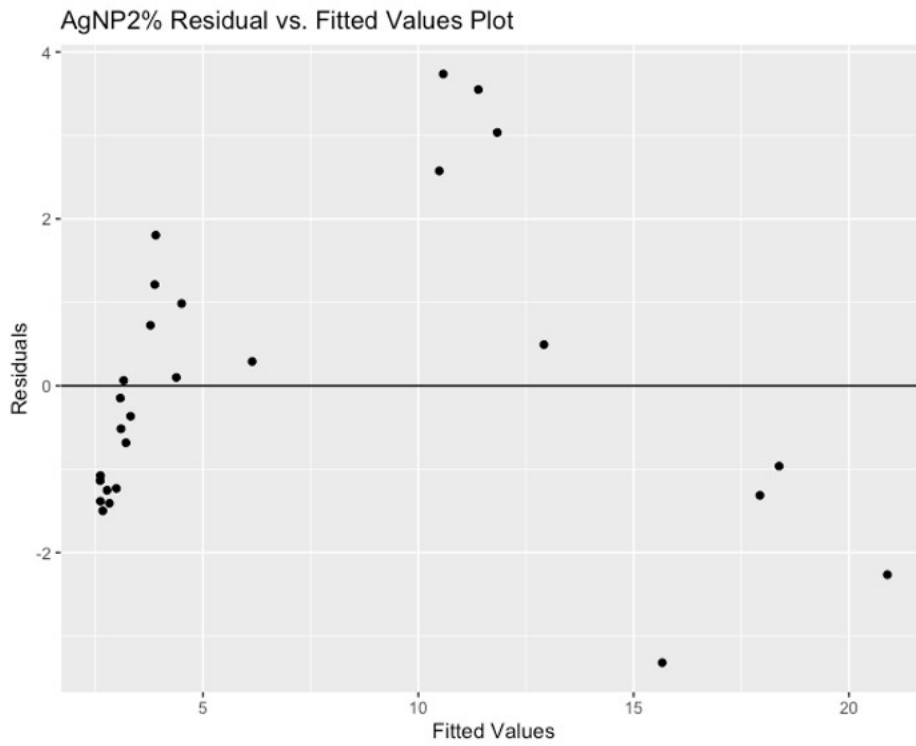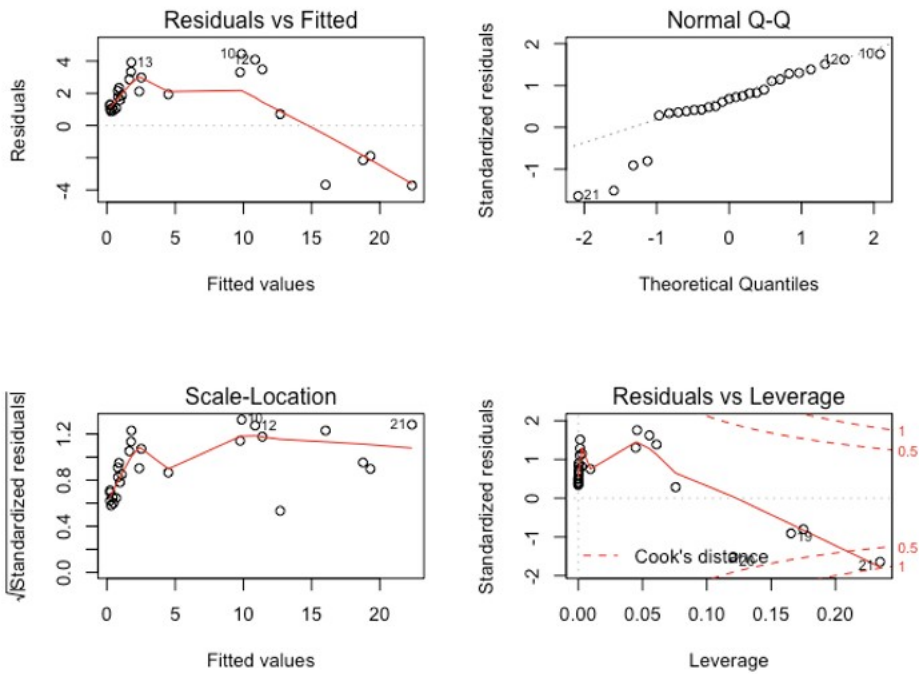

Figure S4: AgNP 2% Statistical Tests with Residual Plot

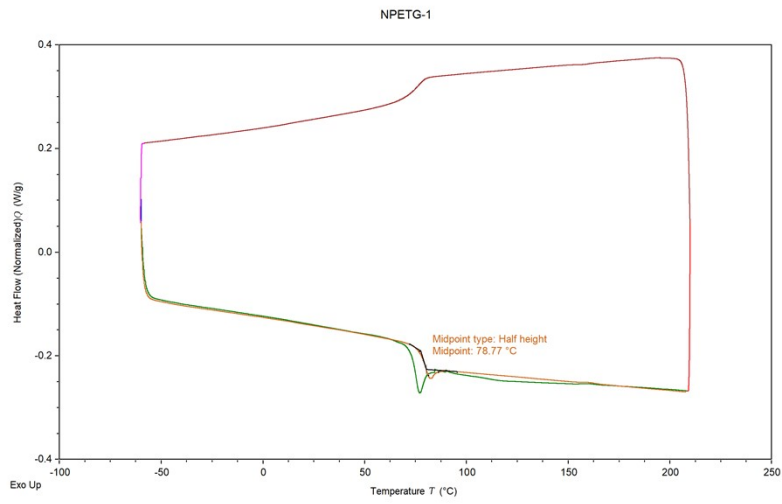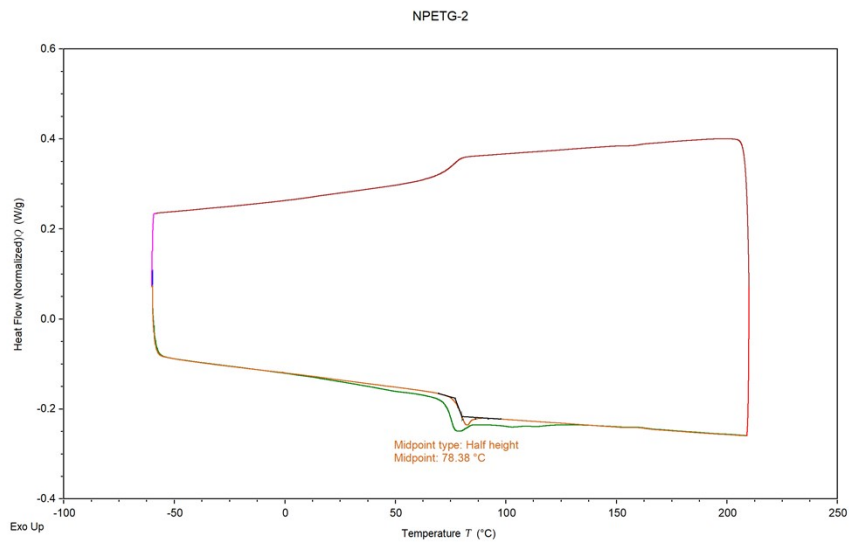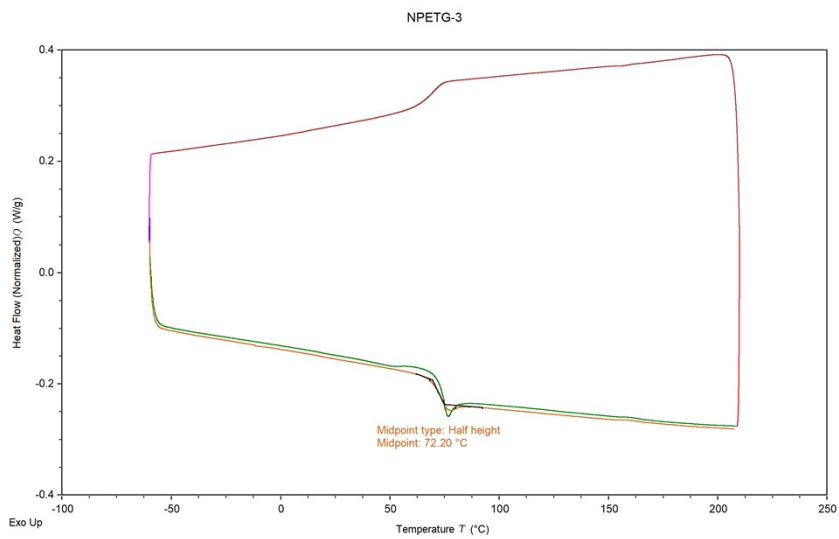

Figure S5) DSC Results for three PETG Replicates

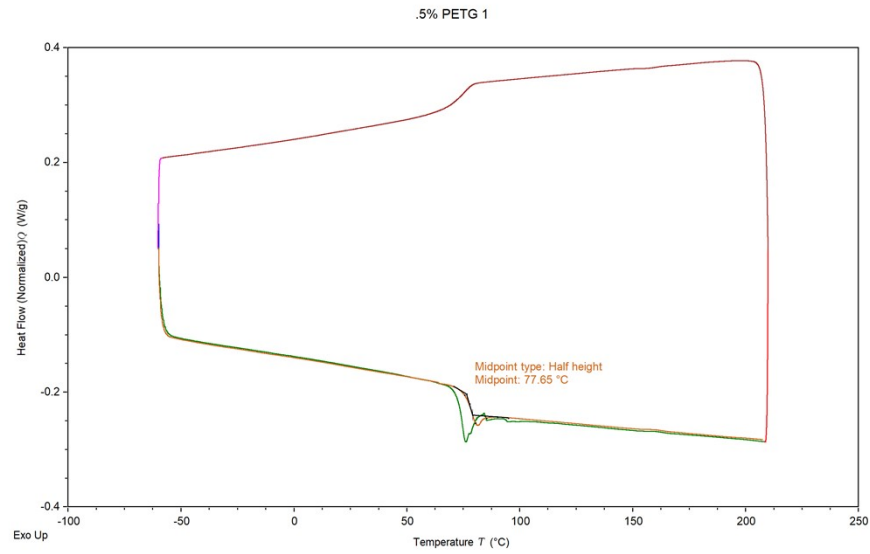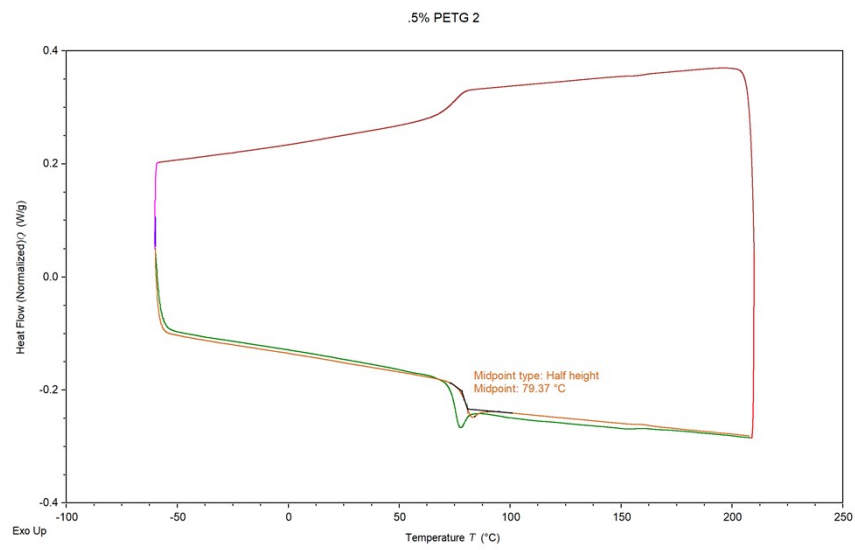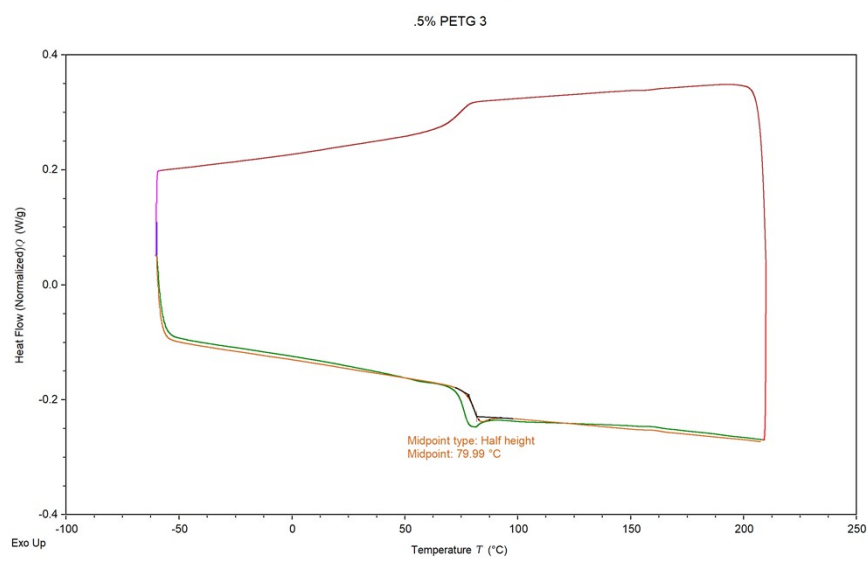

Figure S6) DSC Results for three 0.5%Ag Replicates

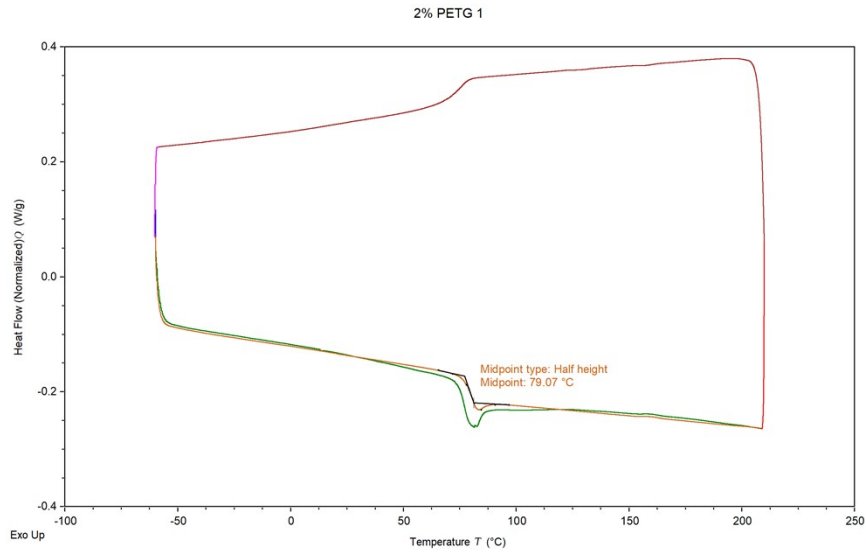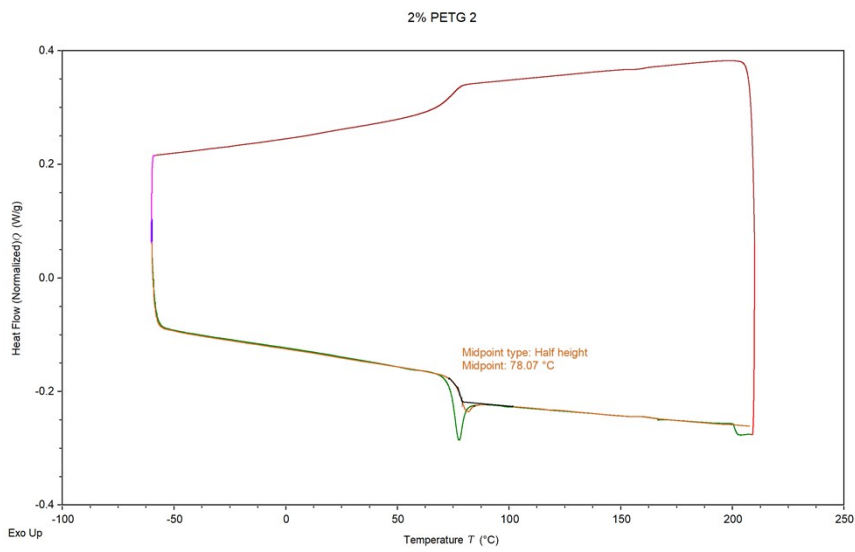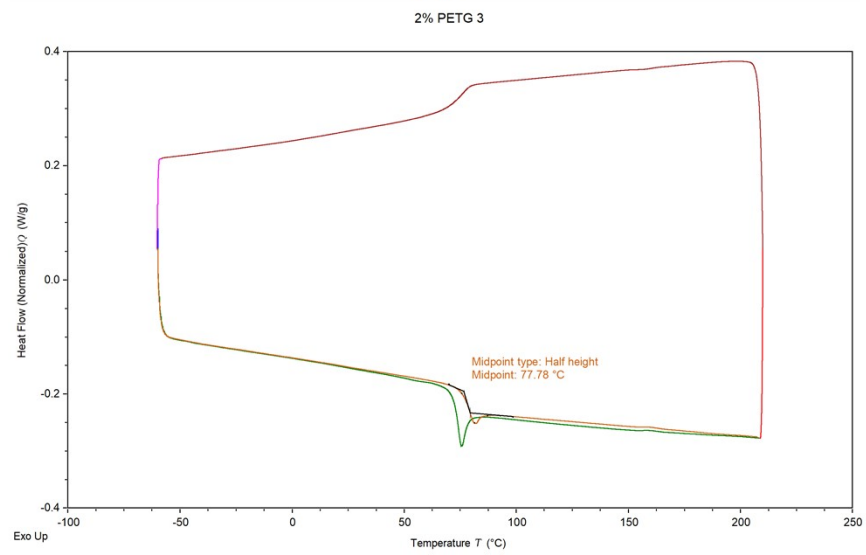

Figure S7) DSC Results for three 2%Ag Replicates



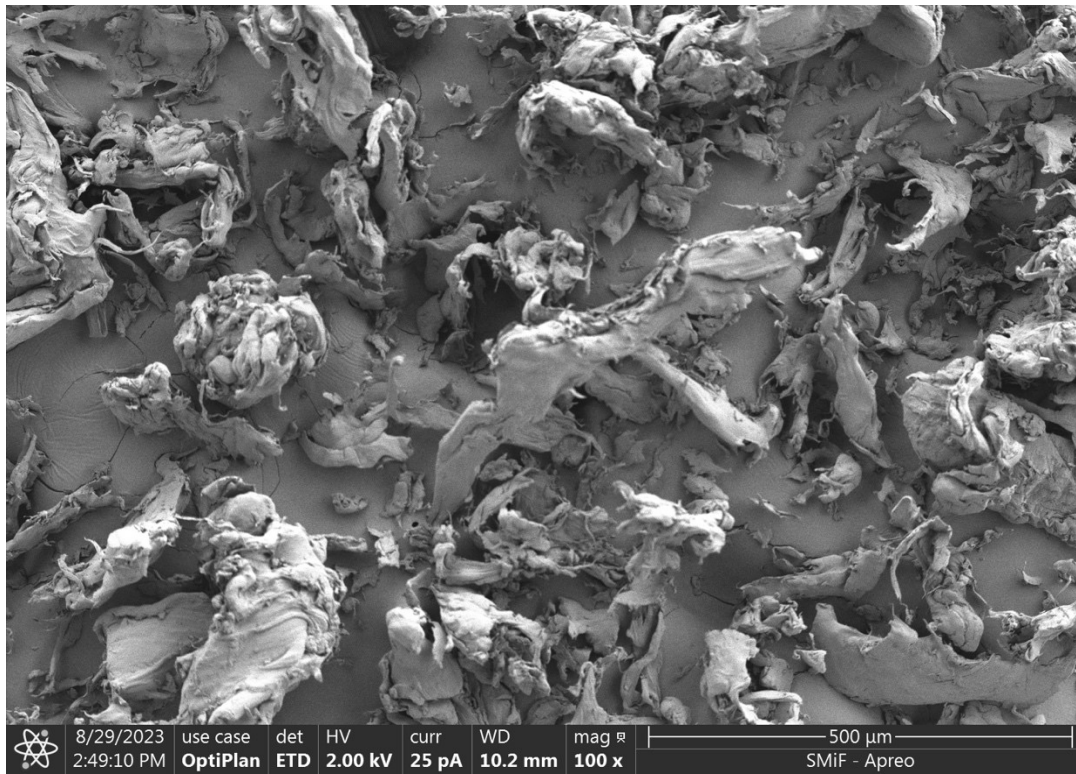

Figure S8: PETG SEM micrograph.

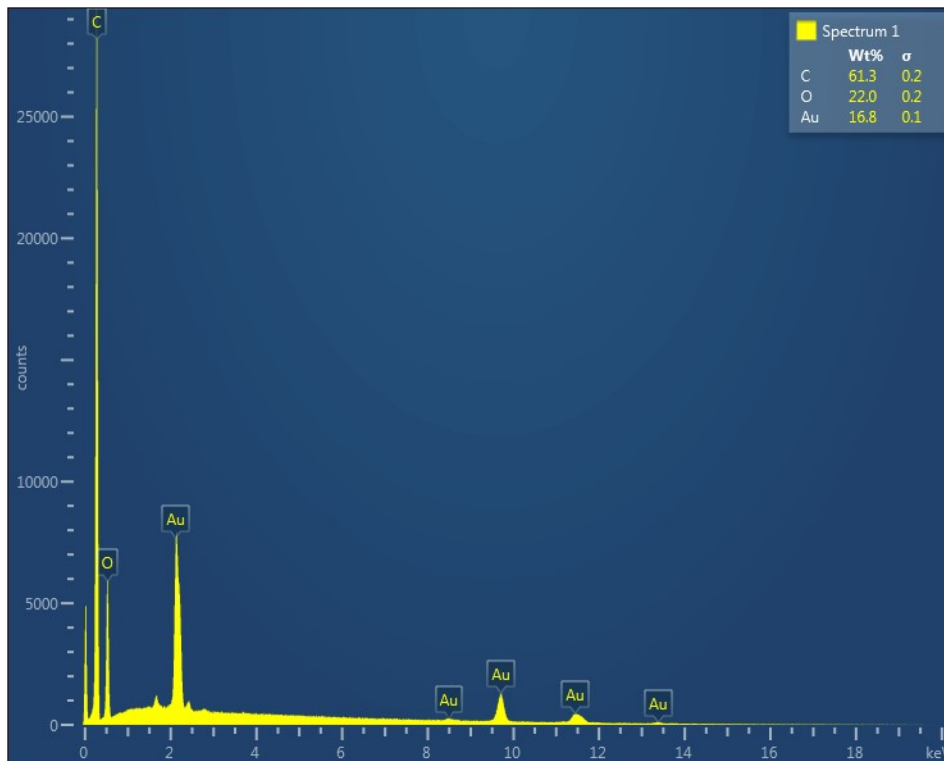

Figure S9: SEM EDS spectrum collected from a PETG particle. Au peaks are from the Au coating used to dissipate charging.

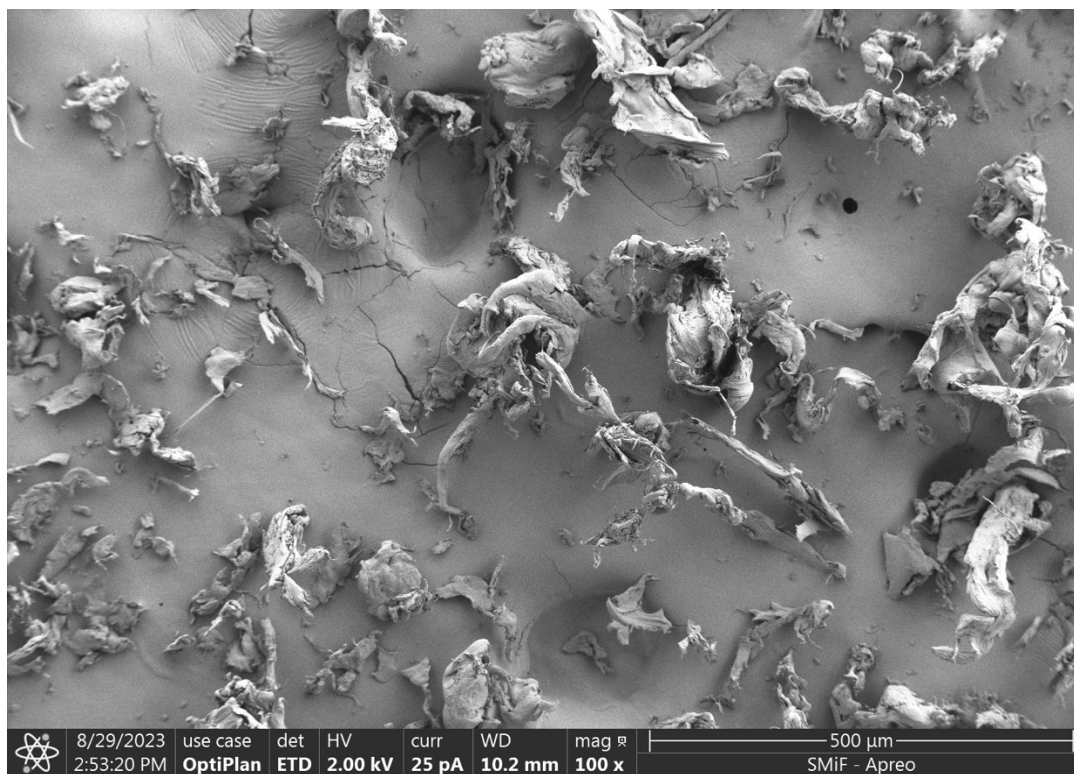

Figure S10: 0.5%Ag SEM micrograph.

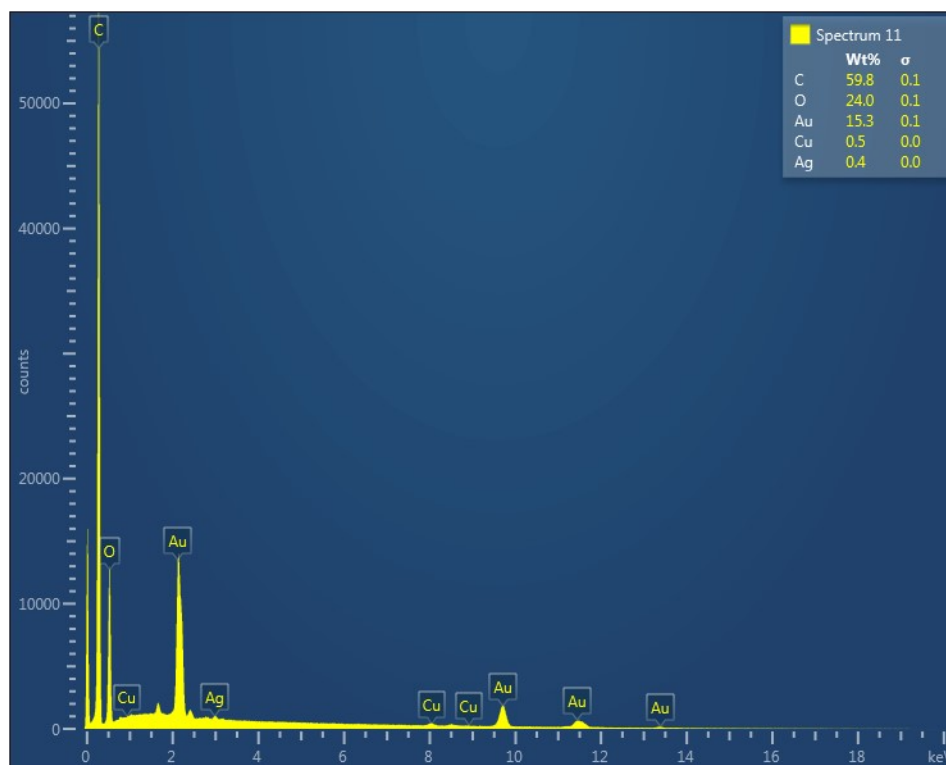

Figure S11: SEM EDS spectrum collected from a 0.5%Ag particle. Au peaks are from the Au coating used to dissipate charging.

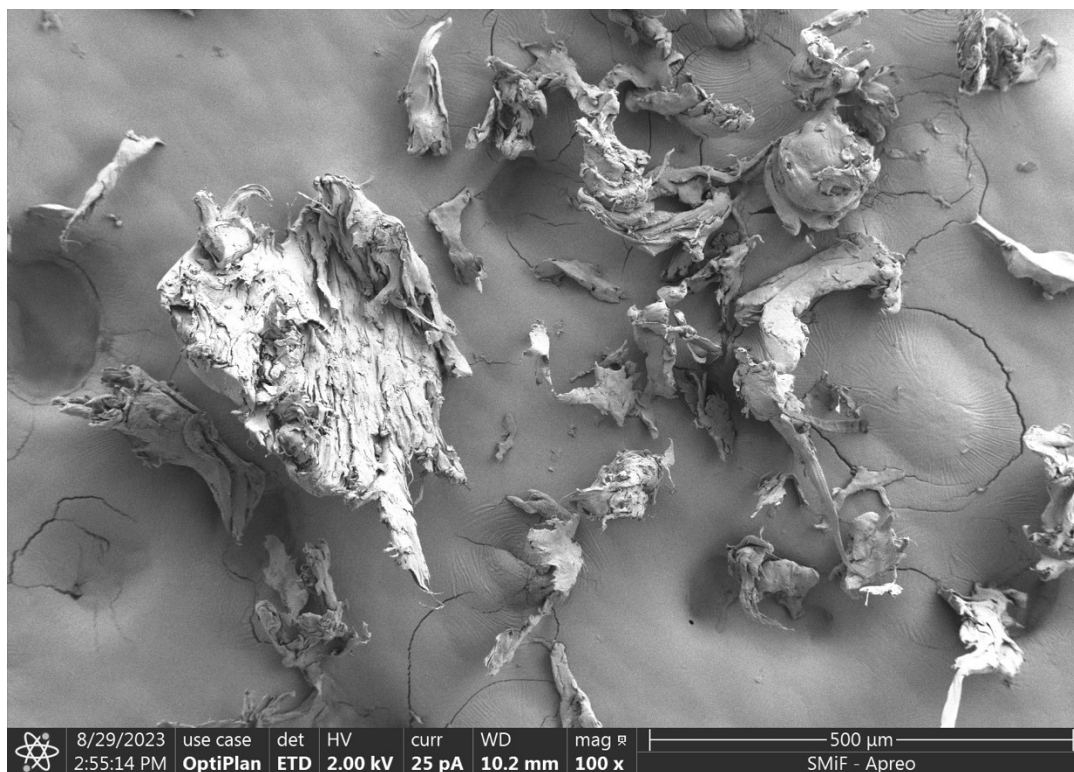

Figure S12: 2%Ag SEM micrograph.

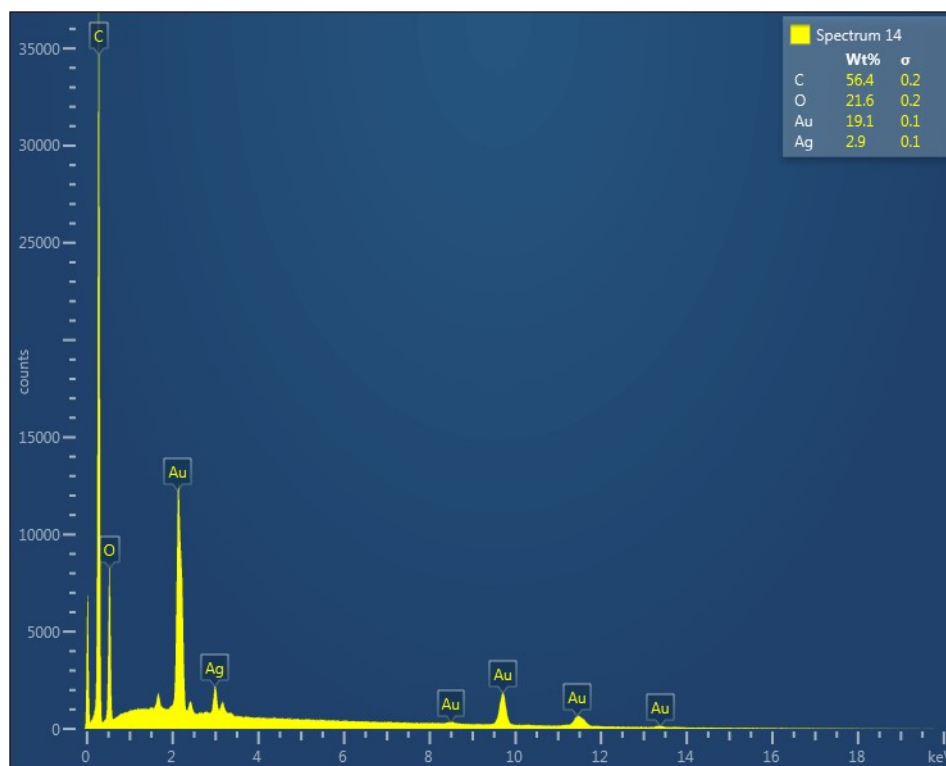

Figure S13: SEM EDS spectrum collected from a 2%Ag particle. Au peaks are from the Au coating used to dissipate charging.

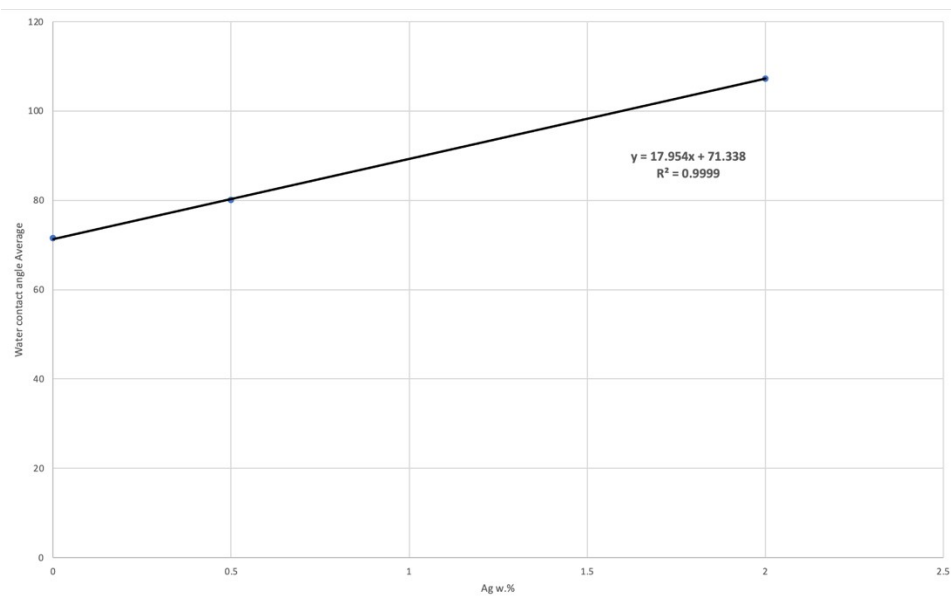

Figure S14: Linear relationship between contact angle and AgNP content in PETG

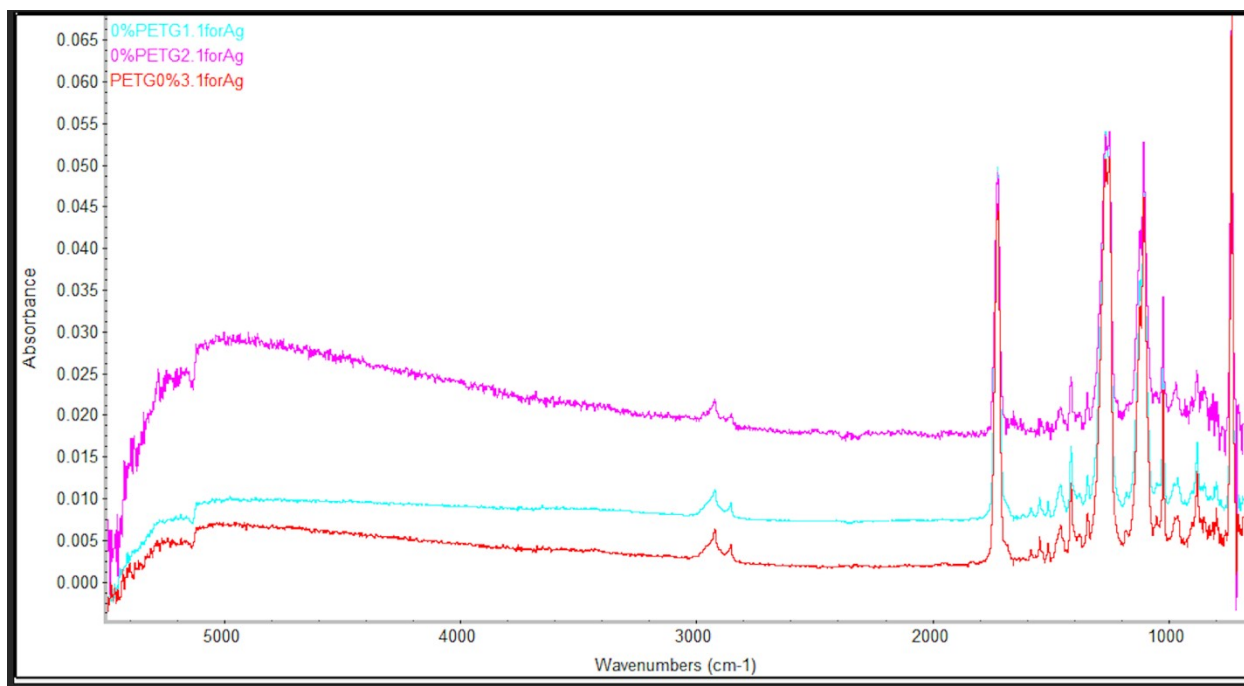

Figure S15: PETG FTIR spectra in triplicate



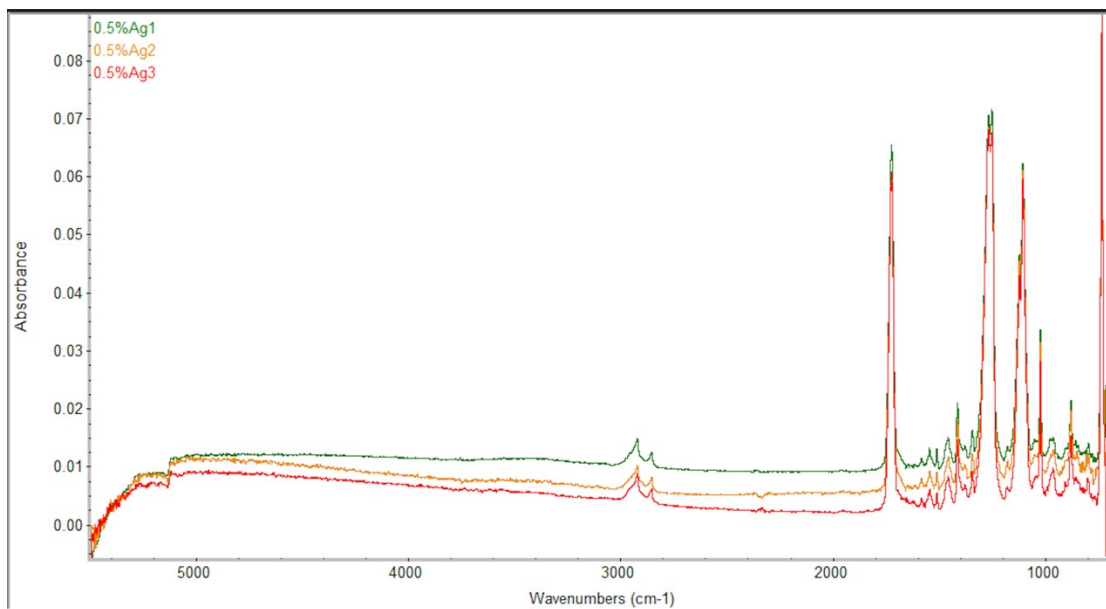

Figure S16: 0.5%Ag Composite FTIR spectra in triplicate

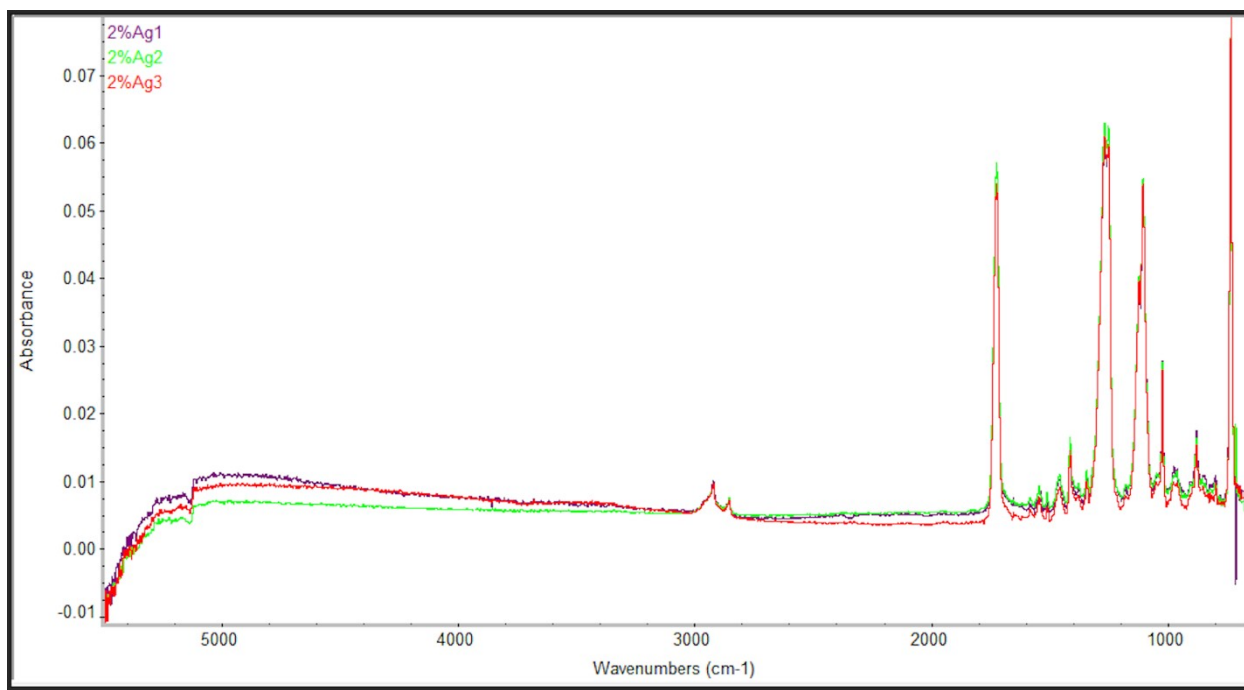

Figure S17: 2%Ag Composite FTIR spectra in triplicate

### Sanding

1. Using Power Consumption Data at 1-3 J/s from (Loredana et al., 2015)
2. Using Power Consumption ideal point at 300 J/s from (Luo et al. 2014)

| Quantity and (units)                                                       | For PETG                                                                                                     | For Ag0.5%                                                                                                    | For Ag2%                                                                                                     |
|----------------------------------------------------------------------------|--------------------------------------------------------------------------------------------------------------|---------------------------------------------------------------------------------------------------------------|--------------------------------------------------------------------------------------------------------------|
| Model fit * low power input (W)                                            | $y = (0.0355x)*1 \pm 0.0140$                                                                                 | $y = (0.0433x) * 1 \pm 0.0296$                                                                                | $y = (0.0341x) * 1 \pm 0.024$                                                                                |
| Model fit * high power input (W)                                           | $y = (0.1179x) * 300 \pm 0.11$                                                                               | $y = (0.1014x) * 300 \pm 0.06$                                                                                | $y = (0.0965x) * 300 \pm 0.1$                                                                                |
| Abrasion rate(g/m <sup>2</sup> /s) time (s) surface area (m <sup>2</sup> ) | $0.0355 \pm 0.014 - 35.37 \pm 0.1514$ g/m <sup>2</sup> /s *3600 s and surface area of 0.00172 m <sup>2</sup> | $0.0433 \pm 0.0296 - 30.42 \pm 0.0615$ g/m <sup>2</sup> /s *3600 s and surface area of 0.00172 m <sup>2</sup> | $0.0341 \pm 0.0248 - 28.95 \pm 44.07$ g/m <sup>2</sup> /s *3600 s and surface area of 0.00172 m <sup>2</sup> |
| Mass exposed to (g/hr)                                                     | $0.2198 \pm 0.0867 - 219.0 \pm 0.94$                                                                         | $0.2681 \pm 0.1833 - 188.4 \pm 0.38$                                                                          | $0.2111 \pm 0.1536 - 179.3 \pm 0.91$                                                                         |

Table S2. Calculations of Sanding using Power inputs

### Chewing

1. Using molar force for baby jaw as 2.5 N from (Tadesse et al.)
2. Using average baby jaw length as 52.5 mm from (Schipper et al.)

$$\frac{2.5 \text{ N} \times 0.0525 \text{ m}}{0.75 \text{ s chew time}} = 0.175 \text{ J/s}$$

| Quantity and (units)                                                       | For PETG                                                                                 | For Ag0.5%                                                                               | For Ag2%                                                                                |
|----------------------------------------------------------------------------|------------------------------------------------------------------------------------------|------------------------------------------------------------------------------------------|-----------------------------------------------------------------------------------------|
| Model fit * power input (W)                                                | $y = (0.0355x)*0.175 \pm 0.0140$                                                         | $y = (0.0433x) * 0.175 \pm$                                                              | $y = (0.0341x) * 0.175 \pm$                                                             |
| Abrasion rate(g/m <sup>2</sup> /s) time (s) surface area (m <sup>2</sup> ) | $0.0062 \pm 0.0025$ g/m <sup>2</sup> /s *60 s and surface area of 0.00172 m <sup>2</sup> | $0.0076 \pm 0.0052$ g/m <sup>2</sup> /s *60 s and surface area of 0.00172 m <sup>2</sup> | $0.006 \pm 0.0043$ g/m <sup>2</sup> /s *60 s and surface area of 0.00172 m <sup>2</sup> |
| Mass exposed to (mg/min)                                                   | $0.6411 \pm 0.2528$                                                                      | $0.7820 \pm 0.5346$                                                                      | $0.6158 \pm 0.4479$                                                                     |

Table S3. Calculations of Chewing using Power inputs

$$P = 3.162 \times 10^{-11} \text{ W from Sipe et al. 2022}$$

| Quantity and (units)                                                       | For PETG                                                                                                    | For Ag0.5%                                                                                                | For Ag2%                                                                                                   |
|----------------------------------------------------------------------------|-------------------------------------------------------------------------------------------------------------|-----------------------------------------------------------------------------------------------------------|------------------------------------------------------------------------------------------------------------|
| Model fit * power input (W)                                                | $y = (0.0355x) * 3.162 \times 10^{-11} \pm 0.0140$                                                          | $y = (0.0433x) * 3.162$                                                                                   | $y = (0.0341x) * 3.162$                                                                                    |
| Abrasion rate(g/m <sup>2</sup> /s) time (s) surface area (m <sup>2</sup> ) | $1.12251 \times 10^{-13} \pm 0.014$ g/m <sup>2</sup> /s *86400 s and surface area of 0.00172 m <sup>2</sup> | $1.3691 \times 10^{-12} \pm 9.35$ g/m <sup>2</sup> /s *86400 s and surface area of 0.00172 m <sup>2</sup> | $1.0782 \times 10^{-12} \pm 7.841$ g/m <sup>2</sup> /s *86400 s and surface area of 0.00172 m <sup>2</sup> |
| Max mass released (g/day)                                                  | $1.6681 \times 10^{-11} \pm 6.5786$                                                                         | $2.0347 \times 10^{-10} \pm 1.39$                                                                         | $1.6024 \times 10^{-10} \pm 1.165$                                                                         |

Table S4. Calculations of Ocean Waves using Power inputs

$P \approx 2.5 W$  from Benumof et al.

| Quantity and (units)                                                       | For PETG                                                                                    | For Ag0.5%                                                                                 | For Ag2%                                                                                   |
|----------------------------------------------------------------------------|---------------------------------------------------------------------------------------------|--------------------------------------------------------------------------------------------|--------------------------------------------------------------------------------------------|
| Model fit * power input (W)                                                | $y = (0.0132e^{(0.8606 * 2.5)} ) \pm 0.0051$                                                | $y = (0.0433x) * 2.5 \pm 0$                                                                | $y = (0.0341x) * 2.5 \pm 0$                                                                |
| Abrasion rate(g/m <sup>2</sup> /s) time (s) surface area (m <sup>2</sup> ) | $0.1135 \pm 0.0051$ g/m <sup>2</sup> /s *86400 s and surface area of 0.00172 m <sup>2</sup> | $0.1083 \pm 0.074$ g/m <sup>2</sup> /s *86400 s and surface area of 0.00172 m <sup>2</sup> | $0.2325 \pm 0.062$ g/m <sup>2</sup> /s *86400 s and surface area of 0.00172 m <sup>2</sup> |
| Mass exposed to (g/day)                                                    | $17 \pm 1$                                                                                  | $16 \pm 11$                                                                                | $13 \pm 9$                                                                                 |

Table S5. Calculations of Ocean Shoreline using Power inputs

$P = 0.034 W$  from Sipe et al. 2022

| Quantity and (units) | For PETG          | For Ag0.5%                  | For Ag2%                   |
|----------------------|-------------------|-----------------------------|----------------------------|
| Model fit * power    | $y = (0.0355x) *$ | $y = (0.0433x) * 0.034 \pm$ | $y = (0.093x) * 0.034 \pm$ |

|                                                                            |                                                                                                |                                                                                                |                                                                                                |
|----------------------------------------------------------------------------|------------------------------------------------------------------------------------------------|------------------------------------------------------------------------------------------------|------------------------------------------------------------------------------------------------|
| input (W)                                                                  | $0.0355 \pm 0.01405$                                                                           |                                                                                                |                                                                                                |
| Abrasion rate(g/m <sup>2</sup> /s) time (s) surface area (m <sup>2</sup> ) | $0.0016 \pm 0.0002$ g/m <sup>2</sup> /s<br>*86400 s and surface area of 0.00172 m <sup>2</sup> | $0.0014 \pm 0.0010$ g/m <sup>2</sup> /s<br>*86400 s and surface area of 0.00172 m <sup>2</sup> | $0.0032 \pm 0.0008$ g/m <sup>2</sup> /s<br>*86400 s and surface area of 0.00172 m <sup>2</sup> |
| Mass exposed to (g/day)                                                    | $0.24 \pm 0.04$                                                                                | $0.20 \pm 0.14$                                                                                | $0.47 \pm 0.12$                                                                                |

Table S6. Calculations of Rivers using Power inputs



| Power (J/time) | abrasion rate (g/m <sup>2</sup> /t) | Power (J/s) | Abrasion Rate (g/s*m <sup>2</sup> ) |
|----------------|-------------------------------------|-------------|-------------------------------------|
| 2% 1           | PETG                                | 17.41426205 | 2.013482762                         |
| 2% 1           | PETG                                | 13.40992113 | 1.324199849                         |
| 2% 1           | PETG                                | 13.06192557 | 1.017420412                         |
| 2% 1           | PETG                                | 4.479858561 | 0.246588535                         |
| 2% 1           | PETG                                | 4.50517657  | 0.170864497                         |
| 2% 1           | PETG                                | 1.758713274 | 0.070869933                         |
| 2% 1           | PETG                                | 2.580478093 | 0.084461427                         |
| 2% 1           | PETG                                | 1.520750698 | 0.043686945                         |
| 2% 1           | PETG                                | 1.543182654 | 0.024270525                         |
| 2% 2           | PETG                                | 14.3155166  | 1.029070264                         |
| 2% 2           | PETG                                | 14.86853677 | 1.187314088                         |
| 2% 2           | PETG                                | 14.94432068 | 1.131977291                         |
| 2% 2           | PETG                                | 5.708098839 | 0.186397633                         |
| 2% 2           | PETG                                | 5.09382142  | 0.18348517                          |
| 2% 2           | PETG                                | 3.22136982  | 0.092227995                         |
| 2% 2           | PETG                                | 2.933240099 | 0.082519785                         |
| 2% 2           | PETG                                | 1.474224878 | 0.023299704                         |
| 2% 2           | PETG                                | 1.174174485 | 0.031066272                         |
| 2% 3           | PETG                                | 16.61807739 | 1.957175144                         |
| 2% 3           | PETG                                | 12.34346342 | 1.670782948                         |
| 2% 3           | PETG                                | 18.62823292 | 2.33094123                          |
| 2% 3           | PETG                                | 6.432560479 | 0.468906545                         |
| 2% 3           | PETG                                | 5.489168748 | 0.262121671                         |
| 2% 3           | PETG                                | 2.953771878 | 0.112615236                         |
| 2% 3           | PETG                                | 2.528615992 | 0.099023742                         |
| 2% 3           | PETG                                | 1.23492214  | 0.024270525                         |
| 2% 3           | PETG                                | 1.418693864 | 0.050482692                         |
| 0.5% 1         | PETG                                | 15.20026892 | 1.433902623                         |
| 0.5% 1         | PETG                                | 14.55420918 | 1.313520818                         |
| 0.5% 1         | PETG                                | 11.97777516 | 1.194109835                         |
| 0.5% 1         | PETG                                | 3.492237602 | 0.113586057                         |
| 0.5% 1         | PETG                                | 5.328220441 | 0.242705251                         |
| 0.5% 1         | PETG                                | 2.402953503 | 0.093198816                         |
| 0.5% 1         | PETG                                | 2.267909239 | 0.06795747                          |
| 0.5% 1         | PETG                                | 1.444154307 | 0.042716124                         |
| 0.5% 1         | PETG                                | 1.252973011 | 0.03883284                          |
| 0.5% 2         | PETG                                | 21.78658207 | 2.043578213                         |
| 0.5% 2         | PETG                                | 17.13373371 | 1.92225588                          |
| 0.5% 2         | PETG                                | 14.49246795 | 1.520305692                         |
| 0.5% 2         | PETG                                | 6.154648548 | 0.509681027                         |
| 0.5% 2         | PETG                                | 5.167389671 | 0.355320487                         |
| 0.5% 2         | PETG                                | 2.232673583 | 0.105819489                         |
| 0.5% 2         | PETG                                | 3.429372616 | 0.14465233                          |
| 0.5% 2         | PETG                                | 1.577463821 | 0.033007914                         |
| 0.5% 2         | PETG                                | 1.068267075 | 0.024270525                         |
| 0.5% 3         | PETG                                | 9.503732083 | 0.402890717                         |
| 0.5% 3         | PETG                                | 21.88199704 | 2.029986719                         |
| 0.5% 3         | PETG                                | 18.24897693 | 1.919313125                         |
| 0.5% 3         | PETG                                | 4.814213702 | 0.133973299                         |
| 0.5% 3         | PETG                                | 3.875722278 | 0.205814053                         |
| 0.5% 3         | PETG                                | 3.060306539 | 0.113586057                         |
| 0.5% 3         | PETG                                | 2.740095638 | 0.088344711                         |
| 0.5% 3         | PETG                                | 1.299928232 | 0.033978735                         |
| 0.5% 3         | PETG                                | 1.172322549 | 0.042716124                         |
| 1              | PETG                                | 17.46174759 | 0                                   |
| 2              | PETG                                | 23.14596374 | 0                                   |
| 3              | PETG                                | 5.432677698 | 0                                   |
| 4              | PETG                                | 6.044521261 | 0                                   |
| 5              | PETG                                | 8.273186445 | 0                                   |
| 6              | PETG                                | 20.75593769 | 0                                   |
| A              | PETG                                | 10.34137913 | 0                                   |
| B              | PETG                                | 12.14468368 | 0                                   |
| C              | PETG                                | 13.83297927 | 0                                   |
| D              | PETG                                | 8.687478398 | 0                                   |
| E              | PETG                                | 6.530675901 | 0                                   |
| F              | PETG                                | 2.806652269 | 0                                   |
| G              | PETG                                | 5.256358817 | 0                                   |
| H              | PETG                                | 4.1204751   | 0                                   |
| I              | PETG                                | 10.42182065 | 0                                   |
| J              | PETG                                | 15.3845198  | 0                                   |
| K              | PETG                                | 5.58693847  | 0                                   |
| L              | PETG                                | 0.852557555 | 0                                   |
| M              | PETG                                | 0           | 0                                   |
| X              | PETG                                | 17.90670506 | 0                                   |
| Y              | PETG                                | 7.203693702 | 0                                   |
| Z              | PETG                                | 9.182802639 | 0                                   |
| Pure 1         | PETG                                | 23.45864717 | 2.183376438                         |
| Pure 1         | PETG                                | 23.9008818  | 3.110510497                         |
| Pure 1         | PETG                                | 18.35370082 | 2.525105431                         |
| Pure 1         | PETG                                | 4.258888005 | 0.499001996                         |
| Pure 1         | PETG                                | 3.725527982 | 0.331049962                         |
| Pure 1         | PETG                                | 2.36056078  | 0.114556878                         |
| Pure 1         | PETG                                | 2.039525893 | 0.06795747                          |
| Pure 1         | PETG                                | 0.420959453 | 0.041745303                         |
| Pure 1         | PETG                                | 0.767779147 | 0.024270525                         |
| Pure 2         | PETG                                | 11.51079548 | 0.442744306                         |
|                |                                     | 21.52703062 | 1.106860766                         |
|                |                                     | 53.20303244 | 4.870187369                         |
|                |                                     | 50.10532239 | 5.091559523                         |
|                |                                     | 27.14300113 | 1.770977225                         |
|                |                                     | 22.65297743 | 1.106860766                         |
|                |                                     | 27.94997826 | 2.656465838                         |
|                |                                     | 40.35029769 | 5.534303829                         |
|                |                                     | 0           | 0                                   |
